# Supplementary material for: Metallovesicles as smart nanoreactors for green catalytic synthesis of benzimidazole derivatives in water
Source: Royal Society of Chemistry journal article supplement (doi:10.1039/c9ta05441c), 2019-01-01
Supplement: c9ta05441c1.pdf [file c9ta05441c1.pdf]

## Metallovesicles as smart nanoreactors for green catalytic synthesis of benzimidazole derivatives in water

Navneet Kaur,<sup>a</sup> Simranpreet Kaur,<sup>a</sup> Gurpreet Kaur,<sup>a</sup> Aman Bhalla,<sup>a</sup> Sesha Srinivasan<sup>b</sup> and Ganga Ram Chaudhary<sup>a\*</sup>

<sup>a</sup>Department of Chemistry & Centre for Advanced Studies in Chemistry, Panjab University, Chandigarh-160014, India

<sup>b</sup>Florida Polytechnic University, Lakeland-33805, Florida, USA

### Supplementary Information

#### **S1: Spectroscopic data (<sup>1</sup>H NMR) of (entries 1a-1i, Table 1).**

Entry 1a: *2-Phenyl-benzimidazole*, white solid, m.p. 292-294 °C; <sup>1</sup>H NMR (DMSO-d<sub>6</sub>, 400 MHz) δ(ppm): 7.22 (q, *J* = 4.2 Hz, 2H), 7.51-7.62 (m, 5H), 8.24 (dd, *J* = 8.8, 1.8 Hz, 2H), 11.81 (s, 1H).

Entry 1b: *2-(2-Methoxyphenyl)benzimidazole*, light yellow solid, m.p. 200-205 °C; <sup>1</sup>H NMR (DMSO-d<sub>6</sub>, 400 MHz,) δ(ppm): 12.75 (s, 1H), 8.11(m, 4H), 7.56 (s, 1H), 7.09 (m, 4H), 3.83 (s, 3H).

Entry 1c: *2-(4-Methoxyphenyl)benzimidazole*, light yellow solid, m.p. 221-223 °C; <sup>1</sup>H NMR (DMSO-d<sub>6</sub>, 400 MHz) δ(ppm): 12.33 (br s, 1H), 8.24 (d, *J* = 4.5 Hz, 2H), 7.78–7.63 (m, 4H), 7.34 (br s, 2H), 3.40 (s, 3H).

Entry 1d: *2-(4-Nitrophenyl)benzimidazole*, light red solid, m.p. 318-320 °C, <sup>1</sup>H NMR (DMSO-d<sub>6</sub>, 400 MHz) δ(ppm): 12.70 (s, 1H), 8.44-8.40 (m, 4H), 7.57 (d, *J* = 6.4 Hz, 2H), 7.19 (d, *J* = 6.4 Hz, 2H).

Entry 1e: *2-(3-Nitrophenyl)benzimidazole*, yellow solid, m.p. 201-203 °C, <sup>1</sup>H NMR (DMSO-d<sub>6</sub>, 400 MHz) δ(ppm): 13.87 (s, 1H), 9.03 (t, *J* = 1.9 Hz, 1H), 8.60-8.64 (m, 1H), 8.30-8.34 (m, 1H), 7.97 (s, 1H), 7.85 (t, *J* = 8.03, 1H), 7.59 -7.75 (m, 1H) 7.25-7.30 (m, 2H).

Entry 1f: *2-(4-Chlorophenyl) benzimidazole*, white solid, m.p. 288-290 °C, <sup>1</sup>H NMR (DMSO-d<sub>6</sub>, 400 MHz) δ(ppm): 7.19-7.26 (m, 2H), 7.52-7.64 (m, 4H), 7.17-7.20 (d, *J* = 11.6 Hz, 2H), 12.99 (s, 1H).

Entry 1g: *2-(4-Bromophenyl)benzimidazole*, white solid, m.p. 294-296 °C, <sup>1</sup>H NMR (400MHz, DMSO-d<sub>6</sub>): δ = 12.50 (s, 1H), 8.19 (d, *J*=8.5 Hz, 2H), 7.67-7.55 (m, 4H), 7.25-7.19 (m, 2H) ppm.

Entry 1h: *2-(4-Cyanophenyl) benzimidazole*, white solid, m.p. 248-250 °C, <sup>1</sup>H NMR (400MHz, DMSO-d<sub>6</sub>): δ =13.18 (s, 1H), 8.33 (d, J=8.3 Hz, 2H), 8.00 (d, J=8.3 Hz, 2H), 7.71 (d, J=7.1 Hz, 1H), 7.57 (d, J=7.1 Hz, 1H), 7.23 (m, 2H) ppm.

Entry 1i: *2-(4-Methylphenyl)benzimidazole*, yellow solid, m.p. 275-276 °C, <sup>1</sup>H NMR (DMSO-d<sub>6</sub>, 400 MHz) δ(ppm): 2.5 (s, 3H), 6.88 (d, J = 11.0 Hz, 2H), 7.11 (q, J = 4.0 Hz, 2H), 7.56 (q, J = 3.5 Hz, 2H), 8.10 (d, J = 10.0 Hz, 2H), 12.56 (br, 1H).

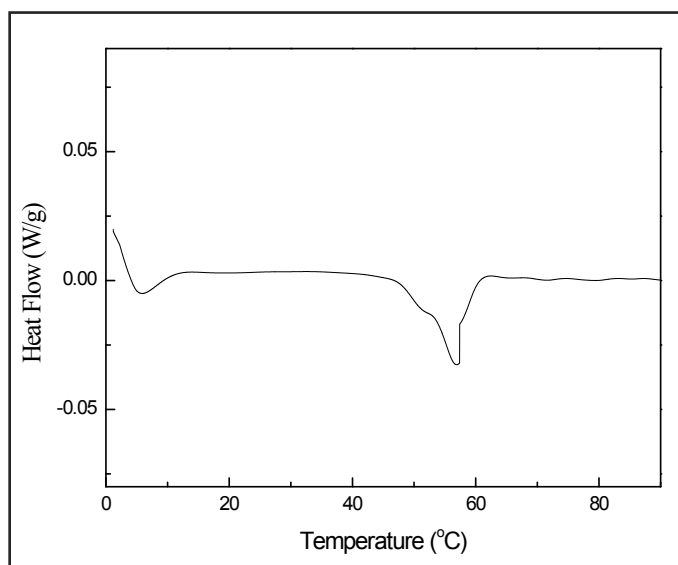

Figure S1 DSC curve showing phase transition temperature of metallosurfactant complex.

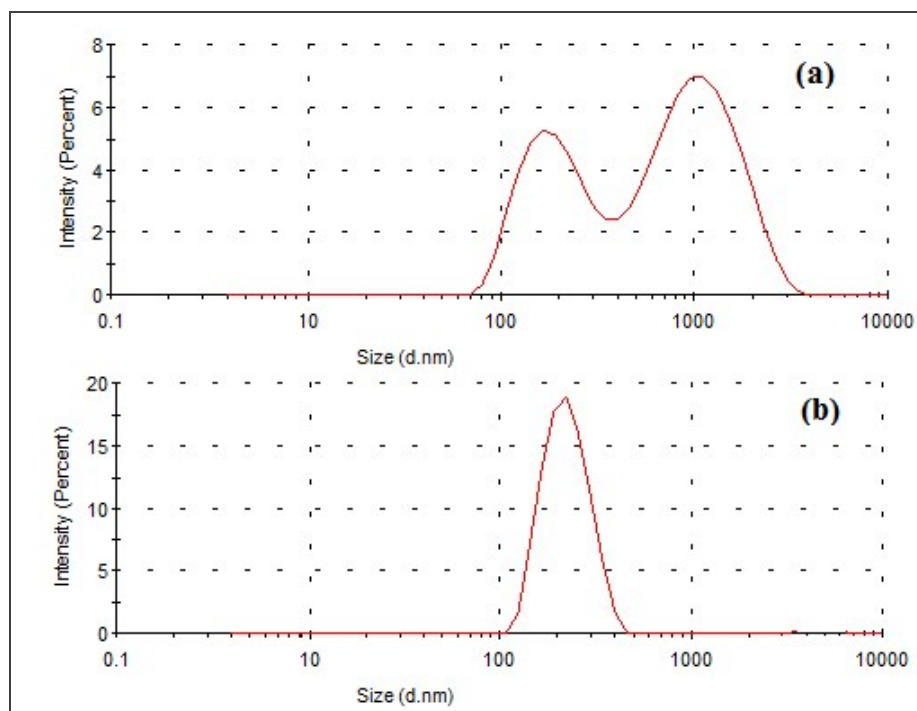

Figure S2 DLS analysis of CuMV (a) before extrusion and (b) after extrusion.

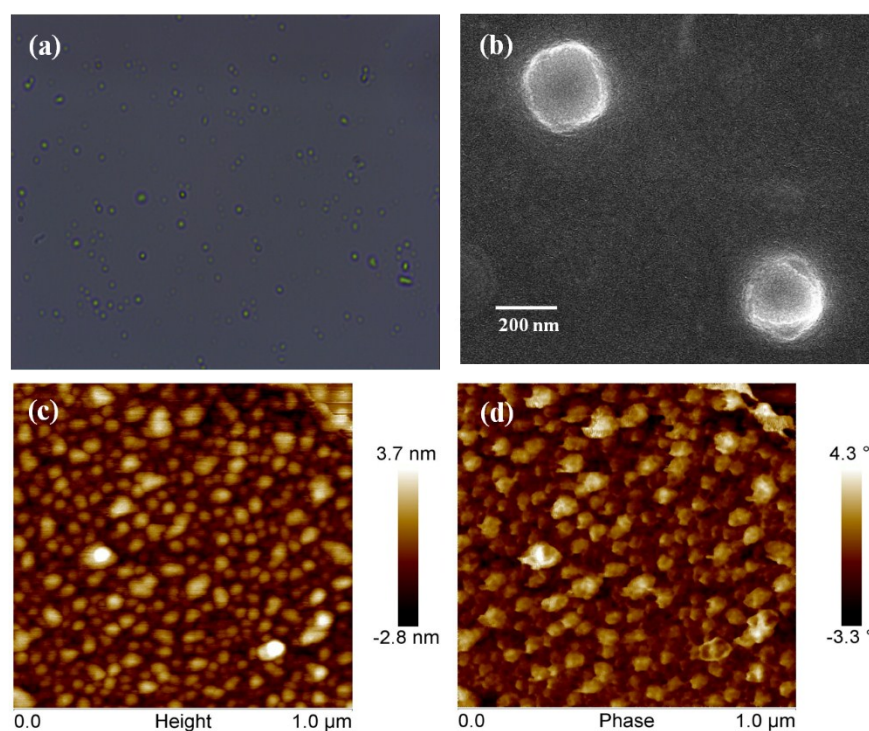

Figure S3 Structural investigations of CuMV showing (a) Conventional light microscope (b) FESEM image (c) AFM height images<sup>58</sup> and (d) AFM phase contrast image.

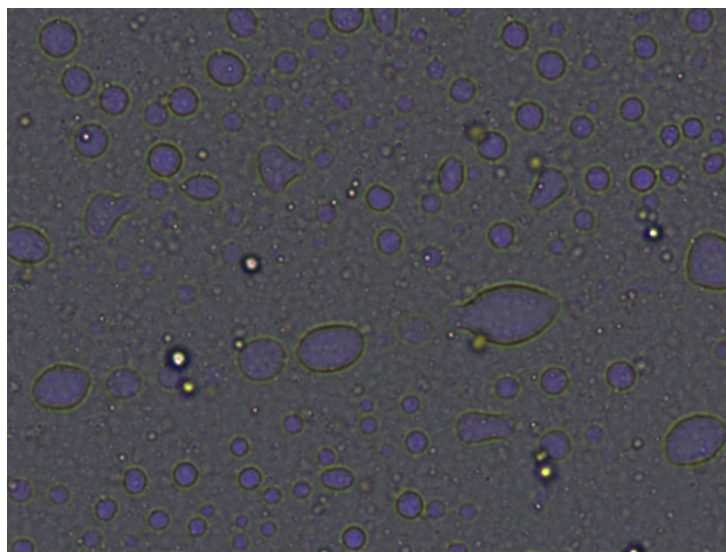

Figure S4 Conventional light microscope images of CuMVs recovered after 6 reaction cycles.

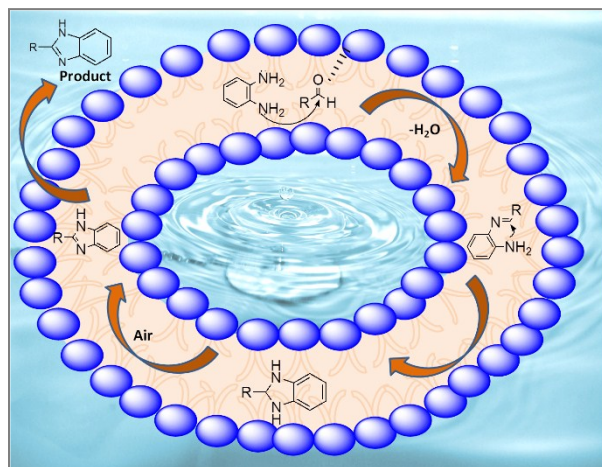

Scheme S1 Proposed mechanism for catalytic action of CuMVs in water.
